# Supplementary material for: Transgenic Expression of Haemonchus contortus Cytochrome P450 Hco-cyp-13A11 Decreases Susceptibility to Particular but Not All Macrocyclic Lactones in the Model Organism Caenorhabditis elegans
Source: MDPI journal article supplement (doi:10.3390/ijms23169155), 2022-08-15
Supplement: s1 [file s1]

# Transgenic expression of *Haemonchus contortus* cytochrome P450 *Hco-cyp-13A11* decreases susceptibility to particular but not all macrocyclic lactones in the model organism *Caenorhabditis elegans*

Natalie Jakobs, Esra Yilmaz and Jürgen Krücken \*

Institute for Parasitology and Tropical Veterinary Medicine, Freie Universität Berlin, 14163 Berlin, Germany; nataliejakobs@web.de (N.J.); esrayz@msn.com (E.Y.)

\* Correspondence: juergen.kruecken@fu-berlin.de; Tel.: +49 (0) 30 838 62318

**Supplementary Materials:** The following are available online at [www.mdpi.com/xxx/s1](http://www.mdpi.com/xxx/s1), Figure S1: Vector design of expression plasmid., Figure S2: Comparison of thrashes per minute between the N2 and the transgenic *Hco-cyp-13A11* *C. elegans*. Figure S3: Multiple sequence alignment of *Hco-cyp-13A11* amplified coding DNA sequences obtained by assembling exon regions from the genomic sequences., Figure S4: B-factor diagrams of Hco-Cyp-13A11 homology models represented by the B-factor putty program in PyMOL., Figure S5: Molecular docking analysis of Cyp-3A4., Figure S6: Molecular docking analysis of inbred-susceptible isolate Hco-Cyp-13A11., Figure S7: Molecular docking analysis of McMaster Hco-Cyp-13A11., Figure S8: Molecular docking analysis of White River Hco-Cyp-13A11.

Table S1: Primer sequences used for RT-PCR and assembly of plasmid construct., Table S2: Primer sequences used to amplify *Hco-cyp-13A11* exon encoding genomic regions., Table S3: Template alignment and sequence analysis of Hco-Cyp-13A11., Table S4: Parameters for evaluation of the best DOPE score model generated by Modeller., Table S5: Predicted positions of human Cyp-3A4 involved in substrate and heme cofactor binding and corresponding amino acids for Cyp-13A11 in different *Haemonchus contortus* isolates from amino acid sequence alignment and molecular docking of the heme cofactor., Table S6: Amino acids interacting with different macrocyclic lactones from molecular docking analysis.

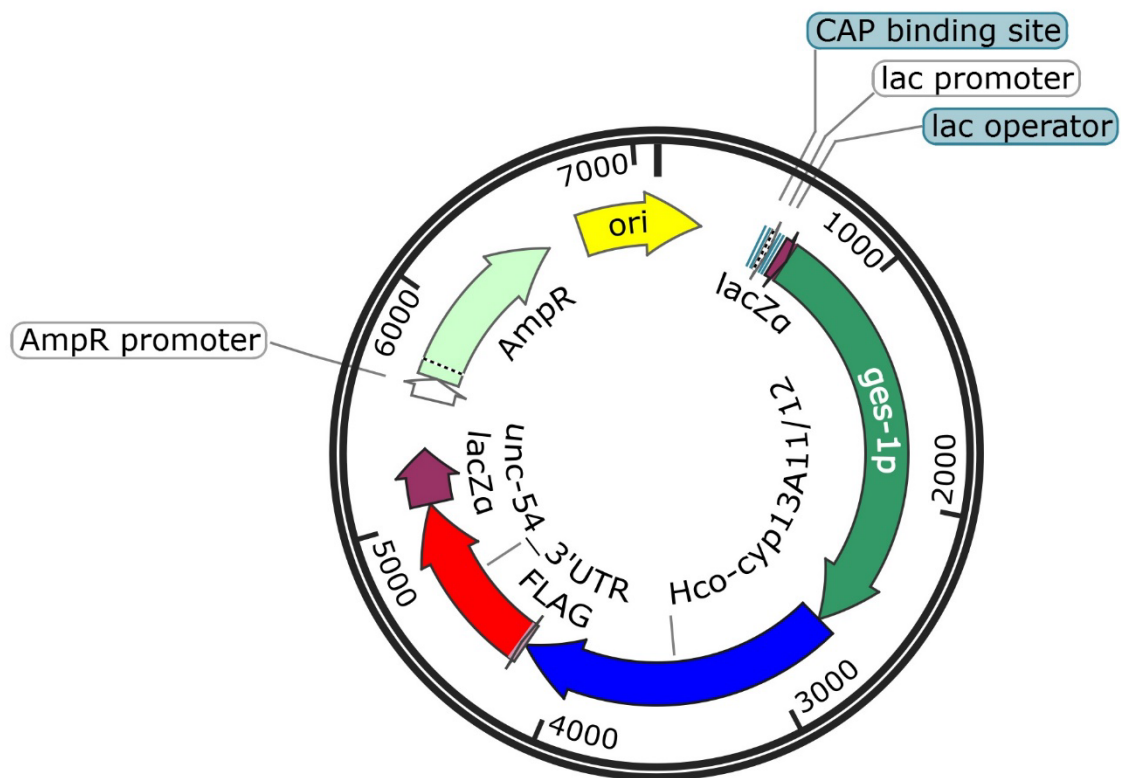

**Cel-ges-1p::Hco-cyp-13A11/12::FLAG::Cel-unc-54\_3'-UTR**  
7086 bp

Figure S1: Vector design of expression plasmid. Vector map of plasmid driving extrachromosomal *Hco-cyp-13A11* expression generated with SnapGene (version 5.3). The pUC19 vector backbone contains elements for bacteria-specific replication and selection. *ges-1p*: *C. elegans ges-1* promoter; *Hco-cyp-13A11*: HCON\_00141052, BioProject PRJEB506; *unc-54\_3'UTR*: *C. elegans unc-54* 3'-UTR (untranslated region); FLAG: Flag-tag GAT TAT AAA GAT GAC GAT GAC AAA or DYKDDDDK (protein sequence).

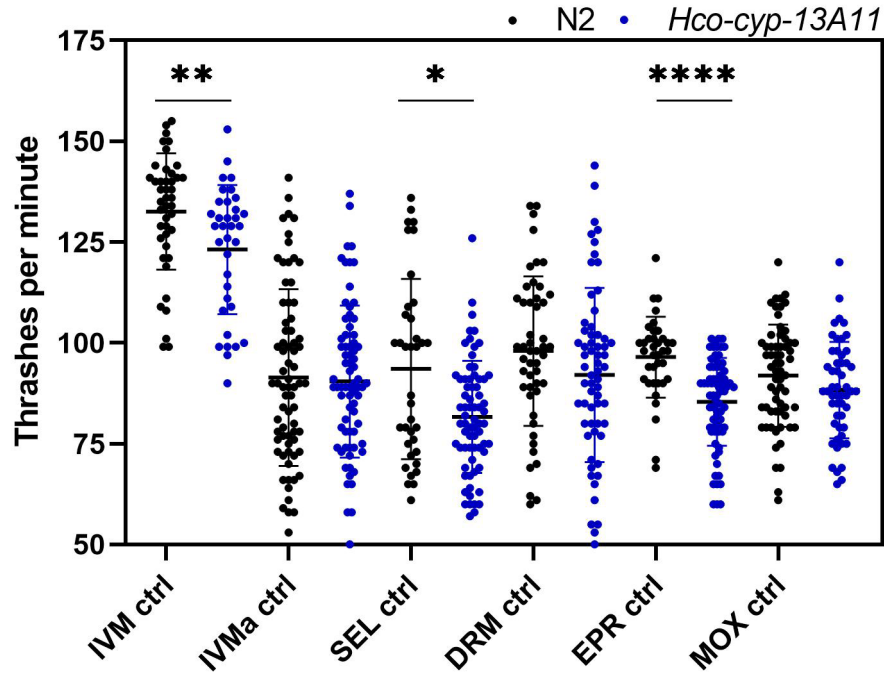

Figure S2: Comparison of thrashes per minute between the N2 and the transgenic *Hco-cyp-13A11* *C. elegans*. The Mann Whitney *U* test was used to compare the thrashes per minute from all DMSO N2 controls (**black**) versus all DMSO controls of the transgenic *Hco-cyp-13A11* *C. elegans* strain (**blue**) for each corresponding drug test (\*  $p = 0.0153$ , \*\*  $p = 0.0055$ , \*\*\*\*  $p < 0.0001$ ). *Hco-cyp-13A11* genotype is *gutCyp-13A11Ex1* [*Cel-ges-1p::Hco-cyp-13A11::FLAG::Cel-unc-54\_3'-UTR*; *Cel-myo-2p::gfp::Cel-unc-54\_3'UTR*]; control strain is N2 Bristol wild-type; ctrl: control; IVM: ivermectin; MOX: moxidectin; EPR: eprinomectin; IVMa: ivermectin aglycone; SEL: selamectin; DRM: doramectin.

WR 1 ATGCTTTTGCTTATCATCGCTGTGTCGTCACCTTCTAGCTTTTCATAAGCTATTACTACTGGCAACTCGATTACTGGAAGCGCGGAGGAATT  
BSI 1 ATGCTTTTGCTTATCATCGCTGTGTCGTCACCTTCTAGCTTTTCATAAGCTATTACTACTGGCAACTCGATTACTGGAAGCGCGGAGGAATT  
ISE 1 ATGCTTTTGCTTATCATCGCTGTGTCGTCACCTTCTAGCTTTTCATAAGCTATTACTACTGGCAACTCGATTACTGGAAGCGCGGAGGAATT  
HCON\_00141052 1 ATGCTTTTGCTTATCATCGCTGTGTCGTCACCTTCTAGCTTTTCATAAGCTATTACTACTGGCAACTCGATTACTGGAAGCGCGGAGGAATT  
McM 1 ATGCTTTTGCTTATCATCGCTGTGTCGTCACCTTCTAGCTTTTCATAAGCTATTACTACTGGCAACTCGATTACTGGAAGCGCGGAGGAATT

WR 91 CCGGGTCCCCGAGGAATGATTTTTCTGGGAAACATGTATGAGCTGACAGATATATCTAAACCAAGTCGGGTGGTTTTGCGAGAGTGGACC  
BSI 91 CCGGGTCCCCGAGGAATGATTTTTCTGGGAAACATGTATGAGCTGACAGATATATCTAAACCAAGTCGGGTGGTTTTGCGAGAGTGGACC  
ISE 91 CCGGGTCCCCGAGGAATGATTTTTCTGGGAAACATGTATGAGCTGACAGATATATCTAAACCAAGTCGGGTGGTTTTGCGAGAGTGGACC  
HCON\_00141052 91 CCGGGTCCCCGAGGAATGATTTTTCTGGGAAACATGTATGAGCTGACAGATATATCTAAACCAAGTCGGGTGGTTTTGCGAGAGTGGACC  
McM 91 CCGGGTCCCCGAGGAATGATTTTTCTGGGAAACATGTATGAGCTGACAGATATATCTAAACCAAGTCGGGTGGTTTTGCGAGAGTGGACC

WR 181 AAAACTTACGGCAAGGTTTACGGTATCCAAGAGGGATTGCGACGGACGATTGTCGTGACGGATATTGAGATGATCCGCGAACTTTTCATA  
BSI 181 AAAACTTACGGCAAGGTTTACGGTATCCAAGAGGGATTGCGACGGACGATTGTCGTGACGGATATTGAGATGATCCGCGAACTTTTCATA  
ISE 181 AAAACTTACGGCAAGGTTTACGGTATCCAAGAGGGATTGCGACGGACGATTGTCGTGACGGATATTGAGATGATCCGCGAACTTTTCATA  
HCON\_00141052 181 AAAACTTACGGCAAGGTTTACGGTATCCAAGAGGGATTGCGACGGACGATTGTCGTGACGGATATTGAGATGATCCGCGAACTTTTCATA  
McM 181 AAAACTTACGGCAAGGTTTACGGTATCCAAGAGGGATTGCGACGGACGATTGTCGTGACGGATATTGAGATGATCCGCGAACTTTTCATA

WR 271 AAAAGTTTGCATGTGAAATCTTTACGGTCAAAAGAGTGGCATCATTTGAGAGTGATGTGGAGAAAGATTCTCGAGTTTCATGCTTTTGAAGCACAA  
BSI 271 AAAAGTTTGCATGTGAAATCTTTACGGTCAAAAGAGTGGCATCATTTGAGAGTGATGTGGAGAAAGATTCTCGAGTTTCATGCTTTTGAAGCACAA  
ISE 271 AAAAGTTTGCATGTGAAATCTTTACGGTCAAAAGAGTGGCATCATTTGAGAGTGATGTGGAGAAAGATTCTCGAGTTTCATGCTTTTGAAGCACAA  
HCON\_00141052 271 AAAAGTTTGCATGTGAAATCTTTACGGTCAAAAGAGTGGCATCATTTGAGAGTGATGTGGAGAAAGATTCTCGAGTTTCATGCTTTTGAAGCACAA  
McM 271 AAAAGTTTGCATGTGAAATCTTTACGGTCAAAAGAGTGGCATCATTTGAGAGTGATGTGGAGAAAGATTCTCGAGTTTCATGCTTTTGAAGCACAA

WR 361 GGTGTACGATGTGAAACGCTCAGAGCGATCTCTAGCCCTGCTTTTTCTCGGGCTCTTTGAAGAAGATCCGCCCAACTGTGGAAAGCTCA  
BSI 361 GGTGTACGATGTGAAACGCTCAGAGCGATCTCTAGCCCTGCTTTTTCTCGGGCTCTTTGAAGAAGATCCGCCCAACTGTGGAAAGCTCA  
ISE 361 GGTGTACGATGTGAAACGCTCAGAGCGATCTCTAGCCCTGCTTTTTCTCGGGCTCTTTGAAGAAGATCCGCCCAACTGTGGAAAGCTCA  
HCON\_00141052 361 GGTGTACGATGTGAAACGCTCAGAGCGATCTCTAGCCCTGCTTTTTCTCGGGCTCTTTGAAGAAGATCCGCCCAACTGTGGAAAGCTCA  
McM 361 GGTGTACGATGTGAAACGCTCAGAGCGATCTCTAGCCCTGCTTTTTCTCGGGCTCTTTGAAGAAGATCCGCCCAACTGTGGAAAGCTCA

WR 451 GTGCTTGCCCTGATGGAATCTTTGAGAGAAGCCGACAAACAAGCTTTTGACATTTTCCCTTTTTATAAGGAGTTTACAATGGATGTG  
BSI 451 GTGCTTGCCCTGATGGAATCTTTGAGAGAAGCCGACAAACAAGCTTTTGACATTTTCCCTTTTTATAAGGAGTTTACAATGGATGTG  
ISE 451 GTGCTTGCCCTGATGGAATCTTTGAGAGAAGCCGACAAACAAGCTTTTGACATTTTCCCTTTTTATAAGGAGTTTACAATGGATGTG  
HCON\_00141052 451 GTGCTTGCCCTGATGGAATCTTTGAGAGAAGCCGACAAACAAGCTTTTGACATTTTCCCTTTTTATAAGGAGTTTACAATGGATGTG  
McM 451 GTGCTTGCCCTGATGGAATCTTTGAGAGAAGCCGACAAACAAGCTTTTGACATTTTCCCTTTTTATAAGGAGTTTACAATGGATGTG

WR 541 ATATGTCGCATCGCAATGGGTCAACAAGGTTCTCAGATGTTCAAGGACAAGAGGAAGTGGCTACCATGGACTCCATATTTCCGACGAAGT  
BSI 541 ATATGTCGCATCGCAATGGGTCAACAAGGTTCTCAGATGTTCAAGGACAAGAGGAAGTGGCTACCATGGACTCCATATTTCCGACGAAGT  
ISE 541 ATATGTCGCATCGCAATGGGTCAACAAGGTTCTCAGATGTTCAAGGACAAGAGGAAGTGGCTACCATGGACTCCATATTTCCGACGAAGT  
HCON\_00141052 541 ATATGTCGCATCGCAATGGGTCAACAAGGTTCTCAGATGTTCAAGGACAAGAGGAAGTGGCTACCATGGACTCCATATTTCCGACGAAGT  
McM 541 ATATGTCGCATCGCAATGGGTCAACAAGGTTCTCAGATGTTCAAGGACAAGAGGAAGTGGCTACCATGGACTCCATATTTCCGACGAAGT

WR 631 TTACGGCAACCGATATTCTATTGGCAAGCATGGCCCCATCGTTACGACGACCTCTGAGCCAGTTCTTCATGGCCATTGTCCTCCCTGCGA  
BSI 631 TTACGGCAACCGATATTCTTTTGGCAAGCATGGCCCCATCGTTACGACGACCTCTGAGCCAGTTCTTCATGGCCATTGTCCTCCCTGCGA  
ISE 631 TTACGGCAACCGATATTCTATTGGCAAGCATGGCCCCATCGTTACGACGACCTCTGAGCCAGTTCTTCATGGCCATTGTCCTCCCTGCGA  
HCON\_00141052 631 TTACGGCAACCGATATTCTATTGGCAAGCATGGCCCCATCGTTACGACGACCTCTGAGCCAGTTCTTCATGGCCATTGTCCTCCCTGCGA  
McM 631 TTACGGCAACCGATATTCTATTGGCAAGCATGGCCCCATCGTTACGACGACCTCTGAGCCAGTTCTTCATGGCCATTGTCCTCCCTGCGA

WR 721 AAGAGCAAAATTCCTGCATTTTCAATGTTATTACAAAACATATCGACGAGAGAATCGAGAAGAGGGCCCAAGACGCGCGAAAGGTGT  
BSI 721 AAGAGCAAAATTCCTGCATTTTCAATGTTATTACAAAACATATCGACGAGAGAATCGAGAAGAGGGCCCAAGACGCGCGAAAGGTGT  
ISE 721 AAGAGTCAGGTTTCAAAAGCATTTGACGCGGAAGAAATTGCTGCTCAGTGCTTTGTGTTTCTCCTGGCAGGCTTCGACACAACAGCTACC  
HCON\_00141052 721 AAGAGCAAAATTCCTGCATTTTCAATGTTATTACAAAACATATCGACGAGAGAATCGAGAAGAGGGCCCAAGACGCGCGAAAGGTGT  
McM 721 AAGAGCAAAATTCCTGCATTTTCAATGTTATTACAAAACATATCGACGAGAGAATCGAGAAGAGGGCCCAAGACGCGCGAAAGGTGT

WR 811 GTATCACAGGAGCACACTGACTTCATAGACCTCTTTTGGACGCGAGAGCTGAACAGGACTTCGACAATAACGCCGAATTTTCAAAATTA  
BSI 811 GTATCACAGGAGCACACTGACTTCATAGACCTCTTTTGGACGCGAGAGCTGAACAGGACTTCGACAATAACGCCGAATTTTCAAAATTA  
ISE 811 GTATCACAGGAGCACACTGACTTCATAGACCTCTTTTGGACGCGAGAGCTGAACAGGACTTCGACAATAACGCCGAATTTTCAAAATTA  
HCON\_00141052 811 GTATCACAGGAGCACACTGACTTCATAGACCTCTTTTGGACGCGAGAGCTGAACAGGACTTCGACAATAACGCCGAATTTTCAAAATTA  
McM 811 GTATCACAGGAGCACACTGACTTCATAGACCTCTTTTGGACGCGAGAGCTGAACAGGACTTCGACAATAACGCCGAATTTTCAAAATTA

WR 901 GGAGTTCAGGTTACAAAGCATTTGACGCGGGAAGAAATTGCTGCTCAGTGCTTTGTGTTTCTACTAGCGGGTTTCGACACTACTGCCACC  
BSI 901 GGAGTTCAGGTTACAAAGCATTTGACGCGCGGAAGAAATTGCTGCTCAGTGCTTTGTGTTTCTCCTGGCAGGCTTCGACACAACAGCTACC  
ISE 901 GGAGTTCAGGTTACAAAGCATTTGACGCGCGGAAGAAATTGCTGCTCAGTGCTTTGTGTTTCTCCTGGCAGGCTTCGACACAACAGCTACC  
HCON\_00141052 901 GGAGTTCAGGTTACAAAGCATTTGACGCGCGGAAGAAATTGCTGCTCAGTGCTTTGTGTTTCTCCTGGCAGGCTTCGACACAACAGCTACC  
McM 901 GGAGTTCAGGTTACAAAGCATTTGACGCGCGGAAGAAATTGCTGCTCAGTGCTTTGTGTTTCTCCTGGCAGGCTTCGACACAACAGCTACC

WR 991 TCATAGCATTTCGTCACCTATCTGTTGGCGAAGAATCCTCGAGTTCAGCAAAATTCACAAGAAGAGATTGATCAGCACA-----TGAT  
BSI 991 TCATAGCATTTCGTCACCTATCTGTTGGCGAAGAATCCTCGAGTTCAGCAGATTCTTCAAGAAGAGATTGATCAGCAGCTGCAACAGTGAC  
ISE 991 TCATAGCATTTCGTCACCTATCTGTTGGCGAAGAATCCTCGAGTTCAGCAGATTCTTCAAGAAGAGATTGATCAGCAGCTGCAACAGTGAC  
HCON\_00141052 991 TCATAGCATTTCGTCACCTATCTGTTGGCGAAGAATCCTCGAGTTCAGCAGATTCTTCAAGAAGAGATTGATCAGCAGCTGCAACAGTGAC  
McM 991 TCATAGCATTTCGTCACCTATCTGTTGGCGAAGAATCCTCGAGTTCAGCAGATTCTTCAAGAAGAGATTGATCAGCAGCTGCAACAGTGAC

WR 1075 AGTGAGACAATAAATATGAGACTCTTTCAAGTATGAAGTATCTCGACTCCGTCATGAAGGAATCCTTGCATATCTCTAGCAATC  
BSI 1081 AGTGAGACAATAAATATGAGACTCTCTCAAGTATGAAGTATCTCGACTCCGTCATGAAGGAATCCTTGCATATCTACCCCCTAGCAGTC  
ISE 1081 AGTGAGACAATAAATATGAGACTCTCTCAAGTATGAAGTATCTCGACTCCGTCATGAAGGAATCCTTGCATATCTACCCCCTAGCAGTC  
HCON\_00141052 1081 AGTGAGACAATAAATATGAGACTCTCTCAAGTATGAAGTATCTCGACTCCGTCATGAAGGAATCCTTGCATATCTACCCCCTAGCAGTC  
McM 1081 AGTGAGACAATAAATATGAGACTCTCTCAAGTATGAAGTATCTCGACTCCGTCATGAAGGAATCCTTGCATATCTACCCCCTAGCAGTC

WR 1165 ATAGCTAACTACGTCGCTGTATGAAATCGACCACGCTCGGACCGCTCAGGGTCGAAGAGGGTGAATTGTAATGTCGATACCATGTCT  
BSI 1171 ATAGCTAACTACGTCGCTGTATGAAATCGACCACGCTTGGACCGATCAGGGTCGAAGAGGGTGAATTGTAATGCGGATACCATGTCC  
ISE 1171 ATAGCTAACTACGTCGCTGTATGAAATCGACCACGCTTGGACCGATCAGGGTCGAAGAGGGTGAATTGTAATGCGGATACCATGTCC  
HCON\_00141052 1171 ATAGCTAACTACGTCGCTGTATGAAATCGACCACGCTTGGACCGATCAGGGTCGAAGAGGGTGAATTGTAATGCGGATACCATGTCC  
McM 1171 ATAGCTAACTACGTCGCTGTATGAAATCGACCACGCTTGGACCGATCAGGGTCGAAGAGGGTGAATTGTAATGCGGATACCATGTCC

WR 1255 CTCACCTTTGATCGCGACTTTTGGGGAAACGATGAGAGGAATTTAGACCTGAAAGATGGACTGAGTTGACGCGGAGGCTTTCAGCGGGC  
BSI 1261 CTCACCTTTGATCGCGCAATTTGGGGAGACGATGAGAGGAATTTAGACCTGAAAGATGGACTGAGTTGACGCGGAGGCTTTCAGCGGGC  
ISE 1261 CTCACCTTTGATCGCGCAATTTGGGGAGACGATGAGAGGAATTTAGACCTGAAAGATGGACTGAGTTGACGCGGAGGCTTTCAGCGGGC  
HCON\_00141052 1261 CTCACCTTTGATCGCGCAATTTGGGGAGACGATGAGAGGAATTTAGACCTGAAAGATGGACTGAGTTGACGCGGAGGCTTTCAGCGGGC  
McM 1261 CTCACCTTTGATCGCGCAATTTGGGGAGACGATGAGAGGAATTTAGACCTGAAAGATGGACTGAGTTGACGCGGAGGCTTTCAGCGGGC

WR 1345 TTCTTGCTCTTTCGGTCTTGGTCCAAGCGAGTGTATAGGAGTGGCACTAGCTCATATGGAAGAAAAGCTTGTCTCGTTTCATCTTCTCAGG  
BSI 1351 TTCTTGCTCTTTCGGTCTTGGTCCAAGCGAGTGTATAGGAGTGGCACTAGCTCATATGGAAGAAAAGCTTGTCTCGTTTCATCTTCTCAGG  
ISE 1351 TTCTTGCTCTTTCGGTCTTGGTCCAAGCGAGTGTATAGGAGTGGCACTAGCTCATATGGAAGAAAAGCTTGTCTCGTTTCATCTTCTCAGG  
HCON\_00141052 1351 TTCTTGCTCTTTCGGTCTTGGTCCAAGCGAGTGTATAGGAGTGGCACTAGCTCATATGGAAGAAAAGCTTGTCTCGTTTCATCTTCTCAGG  
McM 1351 TTCTTGCTCTTTCGGTCTTGGTCCAAGCGAGTGTATAGGAGTGGCACTAGCTCATATGGAAGAAAAGCTTGTCTCGTTTCATCTTCTCAGG

WR 1435 CGGTATAACATCATTTGCACAAATGATACCGAGAAGAAGCTGAAATCAGAGGCTCGTTTCACATTTCGCTCCAGAACTGTTACAGTCCAG  
BSI 1441 CGGTATGACATCATTTGCACAAATGATACCGAGAAGAAGCTGAAATCAGAGGCTCGTTTCACATTTCGCTCCAGAACTGTTACAGTCCAG  
ISE 1441 CGGTATAACATCATTTGCACAAATGATACCGAGAAGAAGCTGAAATCAGAGGCTCGTTTCACATTTCGCTCCAGAACTGTTACAGTCCAG  
HCON\_00141052 1441 CGGTATGACATCATTTGCACAAATGATACCGAGAAGAAGCTGAAATCAGAGGCTCGTTTCACATTTCGCTCCAGAACTGTTACAGTCCAG  
McM 1441 CGGTATAACATCATTTGCACAAATGATACCGAGAAGAAGCTGAAATCAGAGGCTCGTTTCACATTTCGCTCCAGAACTGTTACAGTCCAG

WR 1525 CTACAACGAAGAGAACACTTATGA  
BSI 1531 CTACAACGAAGAGAACACTTATGA  
ISE 1531 CTACAACGAAGAGAACACTTATGA  
HCON\_00141052 1531 CTACAACGAAGAGAACACTTATGA  
McM 1531 CTACAACGAAGAGAACACTTATGA

Figure S3: Multiple sequence alignment of *Hco-cyp-13A11* amplified coding DNA sequences obtained by assembling exon regions from the genomic sequences. Sequences were derived from different *Haemonchus contortus* isolates with HCON\_00141052 (Accession no. LS997566, BioProject PRJEB506) as the reference sequence. Alignment was obtained using Clustal Omega (version 1.2.4) and shading created with BoxShade (version 3.21) with black letters presenting dissimilarities to the consensus sequence.

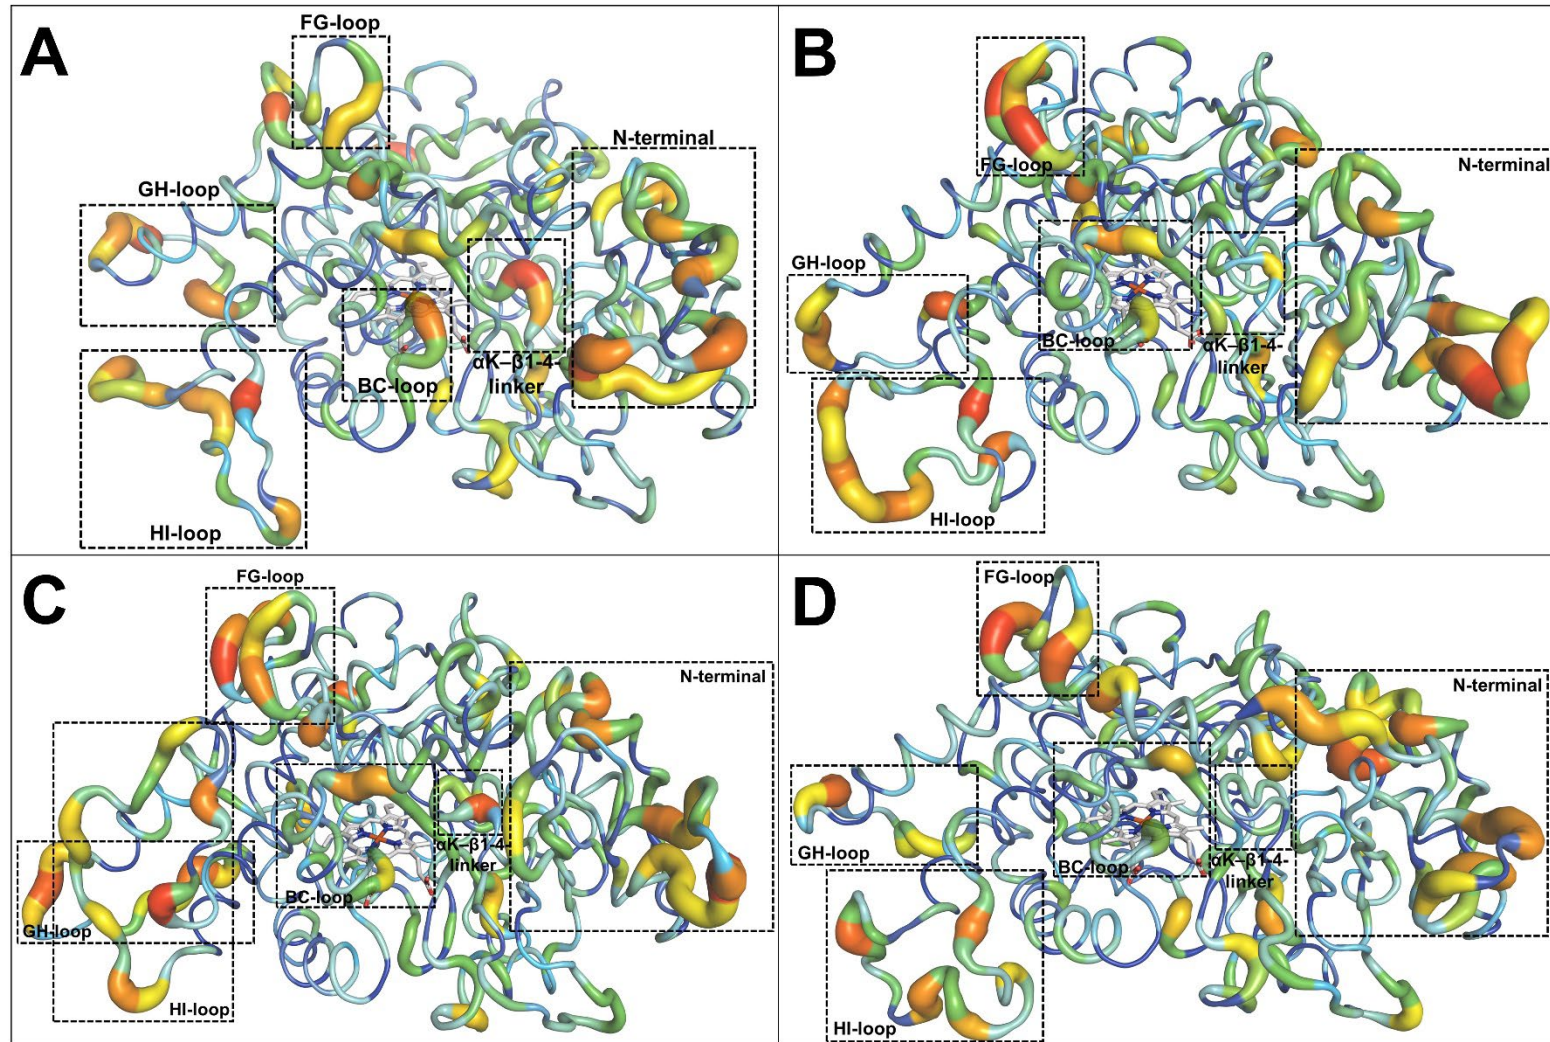

Figure S4: B-factor diagrams of Hco-Cyp-13A11 homology models represented by the B-factor putty program in PyMOL. **A** Inbred-susceptible Edinburgh. **B** McMaster. **C** Berlin-selected Isolate. **D** White River. The B-factor values are illustrated by color ranging from low (blue) to high (red) flexibility with highly flexible loops labeled.



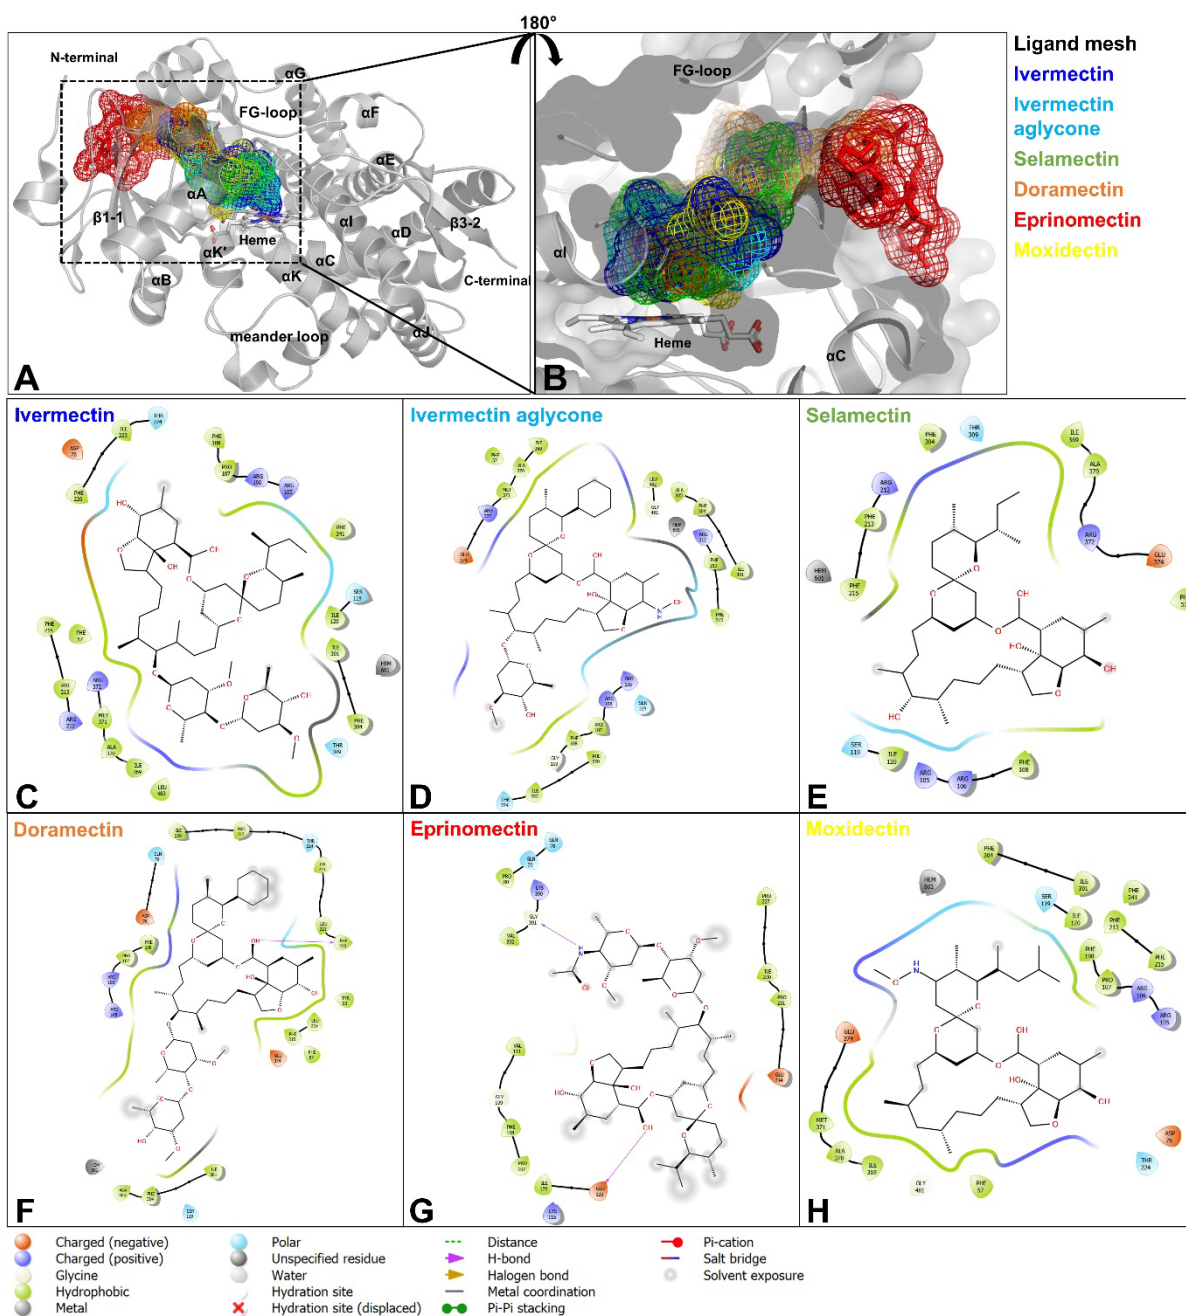

Figure S5: Molecular docking study of Cyp-3A4. **A, B** Overlaid structures of the human Cyp-3A4 (PDB: 6MA7) in complex with IVM (blue), IVMa (cyan), SEL (green), DRM (orange), EPR (red), and MOX (yellow). Ivermectin (**C**), IVMa (**D**), SEL (**E**), and MOX (**H**) docked to the active site cavity. DRM (**F**) and EPR (**G**) docked within a channel towards the active site. The 2D ML ligand-protein interaction diagrams show the closest residues within a 4 Å radius. 2D interaction plots were generated using Maestro Elements (version 4.6.117).

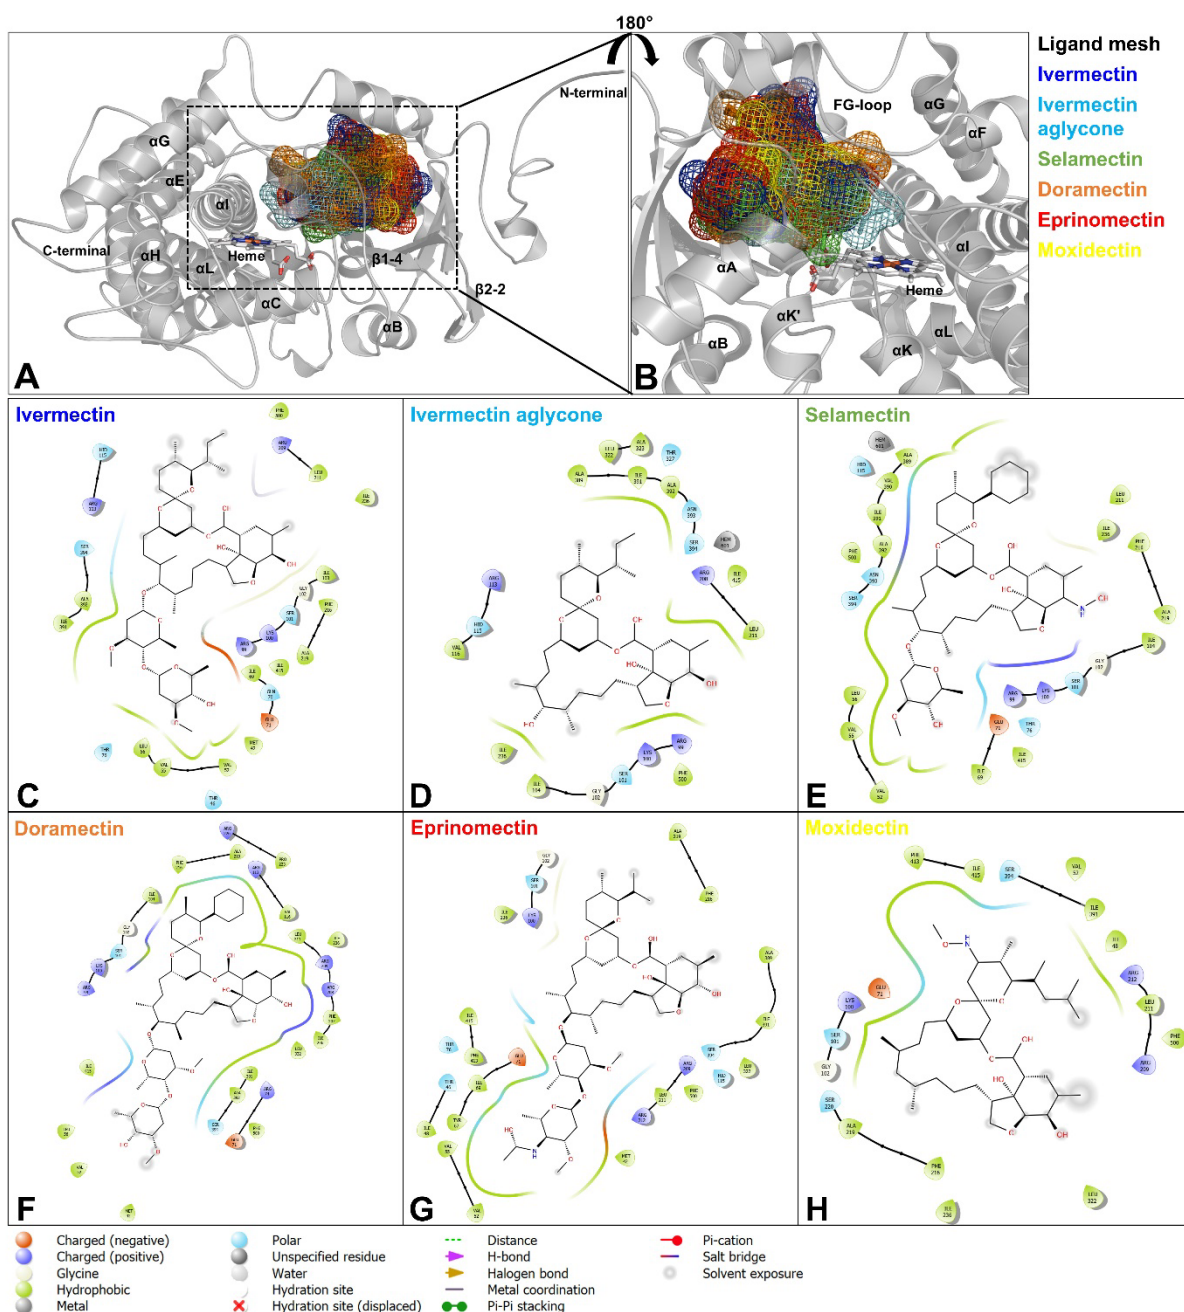

Figure S6: Molecular docking study of inbred-susceptible isolate Hco-Cyp-13A11. **A, B** Overlaid structures of the Hco-Cyp-13A11 Inbred-susceptible Edinburg isolate in complex with IVM (blue), IVMa (cyan), SEL (green), DRM (orange), EPR (red), and MOX (yellow) from different perspectives. IVM (**C**), IVMa (**D**), SEL (**E**), DRM (**F**), EPR (**G**) and MOX (**H**) docked to the active site cavity. The 2D ML ligand-protein interaction diagrams show the closest residues within a 4 Å radius. 2D interaction plots were generated using Maestro Elements (version 4.6.117).

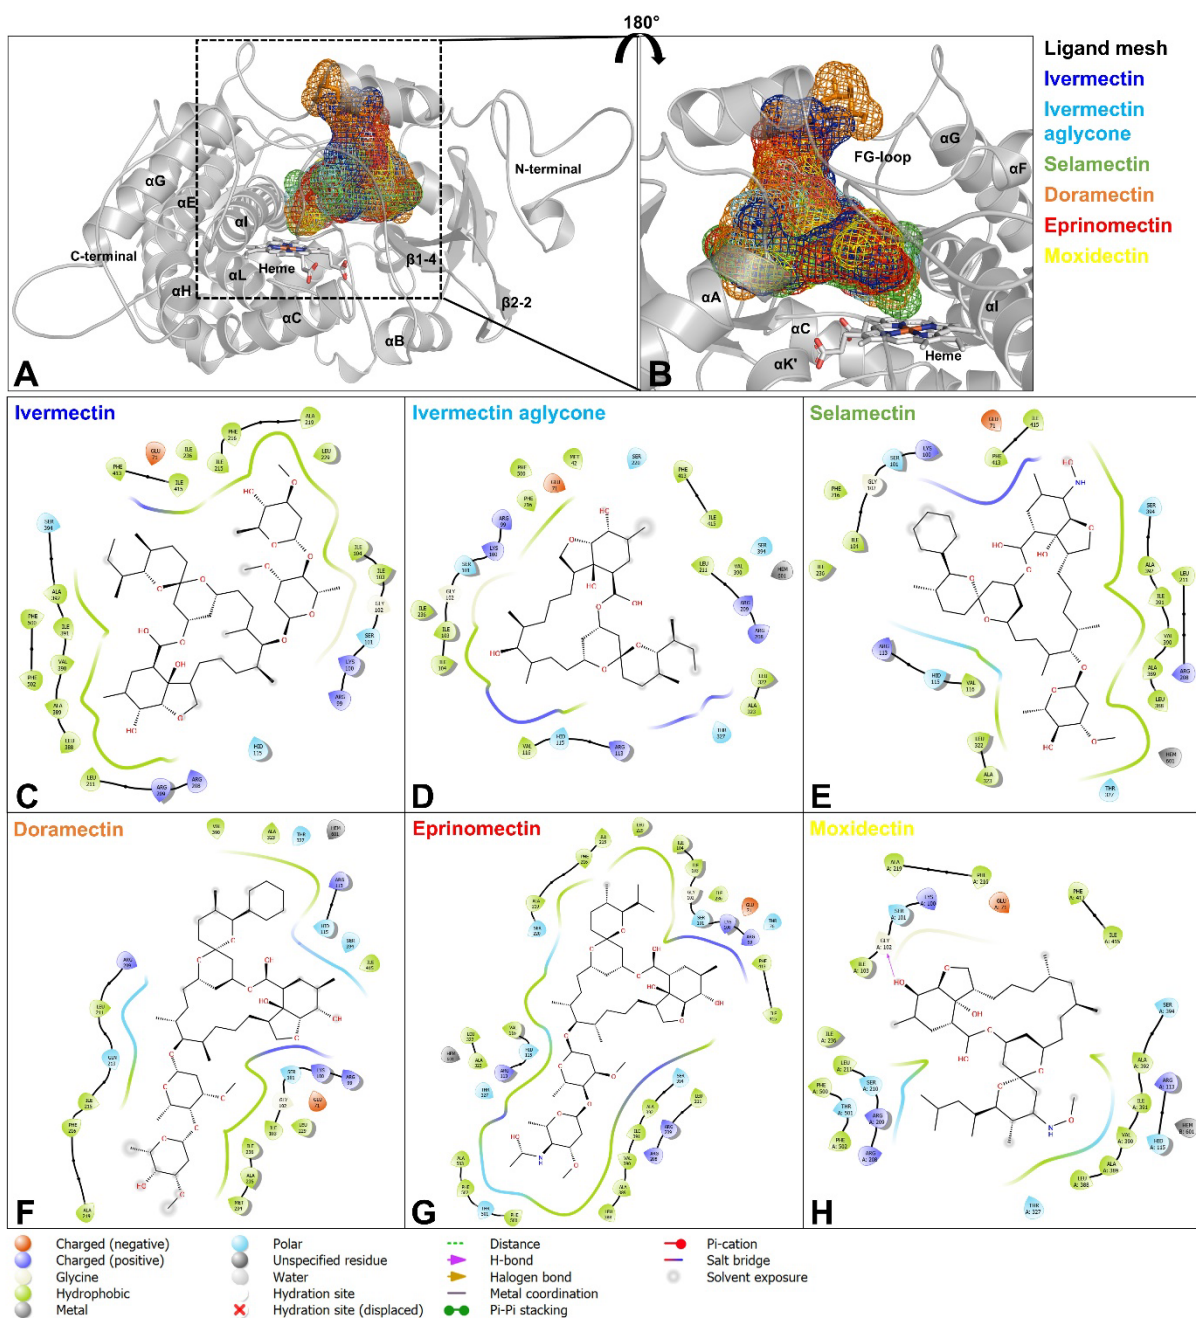

Figure S7: Molecular docking analysis of McMaster Hco-Cyp-13A11. **A, B** Overlaid structures of the Hco-Cyp-13A11 McMaster isolate in complex with IVM (blue), IVMa (cyan), SEL (green), DRM (orange), EPR (red), and MOX (yellow) from different perspectives. IVM (**C**), IVMa (**D**), SEL (**E**), DRM (**F**), EPR (**G**) and MOX (**H**) docked to the active site cavity. The 2D ML ligand-protein interaction diagrams show the closest residues within a 4 Å radius. 2D interaction plots were generated using Maestro Elements (version 4.6.117).



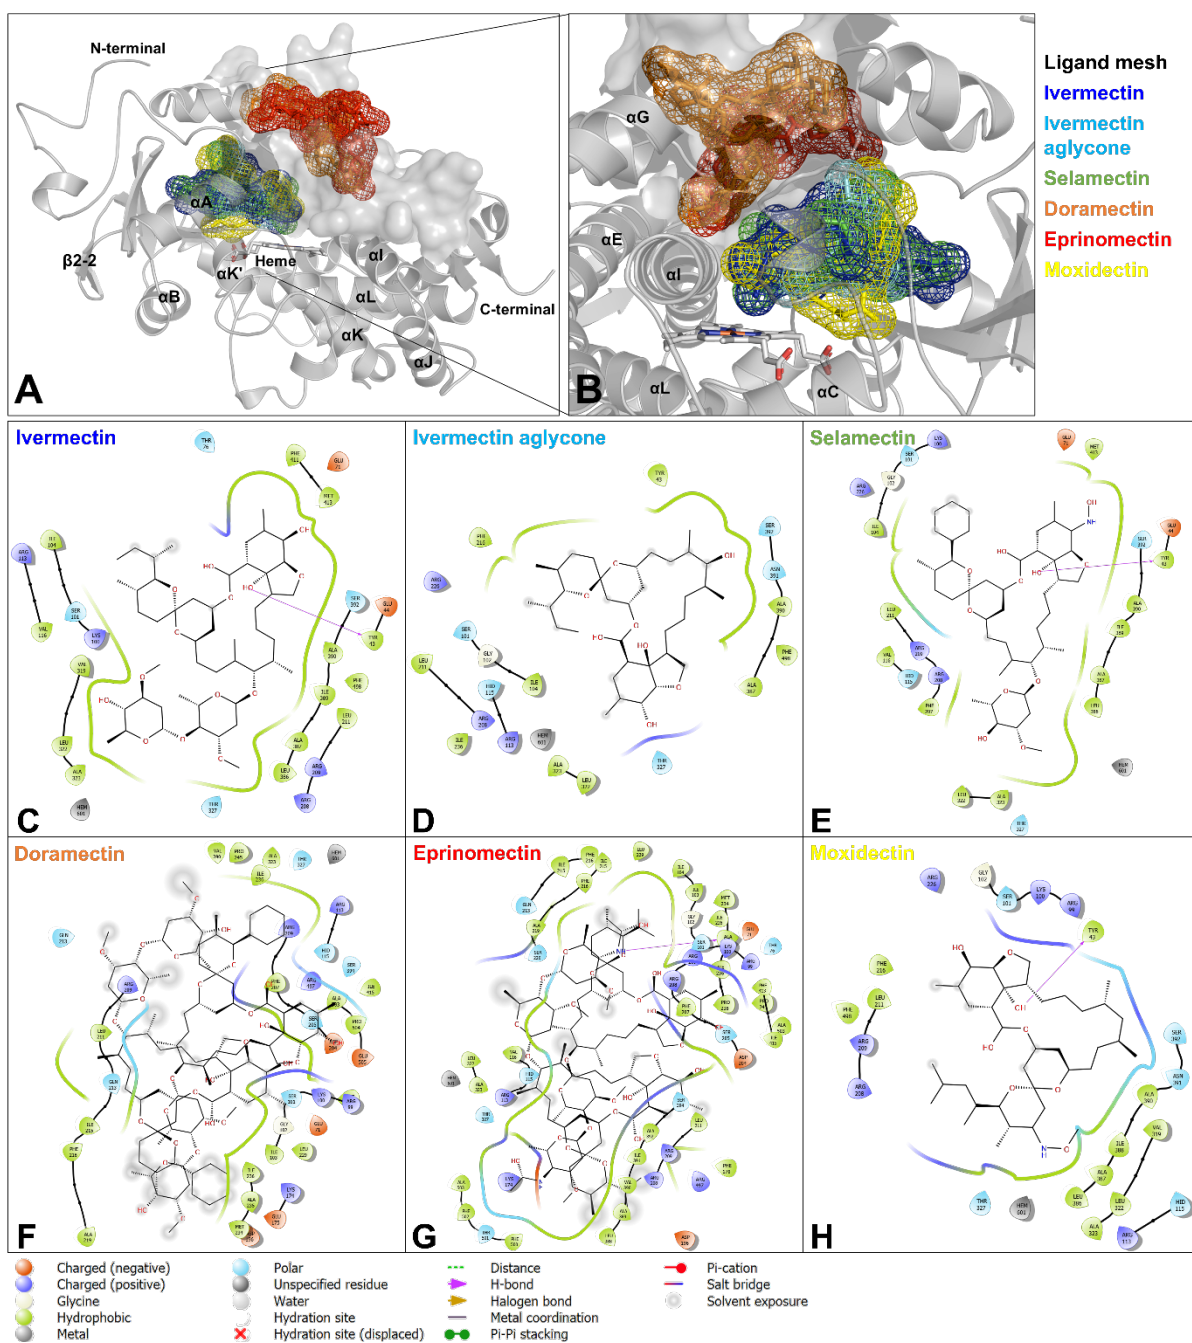

Figure S8: Molecular docking analysis of White River Hco-Cyp-13A11. **A, B** Overlaid structures of the Hco-Cyp-13A11 Berlin-selected isolate in complex with IVM (blue), IVMa (cyan), SEL (green), DRM (orange), EPR (red), and MOX (yellow) from different perspectives IVM (**C**), IVMa (**D**), SEL (**E**), and MOX (**H**) docked to the active site cavity. DRM (**F**) and EPR (**G**) showed the lowest binding energy docked at the outer surface of the FG-loop. The 2D ML ligand-protein interaction diagrams show the closest residues within a 4 Å radius. 2D interaction plots were generated using Maestro Elements (version 4.6.117).

Table S1: Primer sequences used for RT-PCR and assembly of plasmid construct. Assembly primers were designed using NEBuilder®Assembly Tool (version 2.3.1).

| Purpose                | Primer                 | Direction        | Primer sequence (5'→3')                                         | Size [bp] | Elongation time [s] | Annealing temperature [°C] |
|------------------------|------------------------|------------------|-----------------------------------------------------------------|-----------|---------------------|----------------------------|
| Assembly               | pUC19_ges-1            | fwd <sup>a</sup> | cgacggccagtgaattcgagctcggtacccAAACTCCGAACATATGATGAC             | 2000      | 30                  | 55.6                       |
|                        | Hco-cyp-13A11_ges-1    | rev <sup>b</sup> | gataagcaaaagcatCTGAATTCAAAGATAAGATATGTAATAG                     |           |                     |                            |
| Assembly and<br>RT-PCR | ges-1_Hco-cyp-13A11    | fwd              | tatctttgaattcagATGCTTTTGCTTATCATCG                              | 1552      | 30                  | 57.8                       |
|                        | unc54UTR_Hco-cyp-13A11 | rev              | catcgtcatctttataatcTAAGTGTTCTCTTCGTTGTAGC                       |           |                     |                            |
| Assembly               | Hco-cyp-13A11_unc54UTR | fwd              | cgaagagaacacttagattataaagatgacgatgacaaatagGTCCAATTACTCTTCAACATC | 848       | 30                  | 55.1                       |
|                        | pUC19_unc54UTR         | rev              | atgcctgcaggtcgactctagaggatccccCCGGAAAACACAATAATG                |           |                     |                            |

<sup>a</sup> fwd: forward.

<sup>b</sup> rev: reverse.

Table S2: Primer sequences used to amplify *Hco-cyp-13A11* (HCON\_00141052, Accession no. LS997566, BioProject PRJEB506) exon encoding genomic regions to compare the sequences for different *Haemonchus contortus* isolates.

| <i>Haemonchus contortus</i> isolate | (Overspanning) Exon region | Primer                               | Primer sequence (5'→3')                                 | Amplicon length (bp) | Elongation time [s] | Annealing temperature [°C] |
|-------------------------------------|----------------------------|--------------------------------------|---------------------------------------------------------|----------------------|---------------------|----------------------------|
| White River                         | 1, 2                       | fwd <sup>a</sup><br>rev <sup>b</sup> | TGGTCACCTTTCGTCATCGG<br>GAATTCCTCGCCGCTTCCAG            | 1077                 | 40                  | 69.3                       |
|                                     | 2, 3, 4                    | fwd<br>rev                           | ACTTACAGCTATTACTACTGGCAA<br>TGTGAGTCAACGCACCTTCT        | 597                  | 30                  | 60.5                       |
|                                     | 5, 6, 7                    | fwd<br>rev                           | CTCTTTAGATCCGCCCAACTGT<br>TTTAAATCAACCAAACCTCAGAGG      | 501                  | 30                  | 62.4                       |
|                                     | 8, 9                       | fwd<br>rev                           | CGTTCCTGCCGTTTCGATTGT<br>CGAGCTTGAACCGTTTCTCG           | 429                  | 30                  | 64.4                       |
|                                     | 10, 11, 12                 | fwd<br>rev                           | GCCATCATTACAGGTTACAAAGCA<br>CCTTCAGGTCTAAATTCCTCTGC     | 617                  | 40                  | 61.5                       |
|                                     | 13                         | fwd<br>rev                           | AGATGGACTGAGTTGACGGC<br>CACCTCGGTATCATTGTGTGCA          | 162                  | 15                  | 63.9                       |
|                                     | 14                         | fwd<br>rev                           | AGTCCTCGAAGTCTCGGTCA<br>CTCAGGAGGAACAACCACCA            | 227                  | 15                  | 62.4                       |
|                                     |                            |                                      |                                                         |                      |                     |                            |
| Berlin-Selected Isolate             | 1, 2                       | fwd<br>rev                           | TGGTCACCTTTCGTCATCGG<br>GAATTCCTCGCCGCTTCCAG            | 1077                 | 40                  | 68.2                       |
|                                     | 2, 3, 4                    | fwd<br>rev                           | AGTCAATAAAGTAGGTGGAGACGT<br>GCTTCGGTACCCCTGAAACC        | 694                  | 30                  | 63.0                       |
|                                     | 5, 6, 7                    | fwd<br>rev                           | CTCTTTAGATCCGCCCAACTGT<br>TTTAAATCAACCAAACCTCAGAGG      | 501                  | 30                  | 60.9                       |
|                                     | 8, 9                       | fwd<br>rev                           | CGTTCCTGCCGTTTCGATTGT<br>CGAGCTTGAACCGTTTCTCG           | 429                  | 30                  | 64.4                       |
|                                     | 10, 11, 12                 | fwd<br>rev                           | TGCTTCAGAAATGGCCATCA<br>GCACGATTCTACCTCAGCA             | 603                  | 40                  | 60.5                       |
|                                     | 13                         | fwd<br>rev                           | AGATGGACTGAGTTGACGGC<br>CACCTCGGTATCATTGTGTGCA          | 162                  | 15                  | 62.4                       |
|                                     | 14                         | fwd<br>rev                           | AGTCCTCGAAGTCTCGGTCA<br>CTCAGGAGGAACAACCACCA            | 227                  | 15                  | 61.9                       |
|                                     |                            |                                      |                                                         |                      |                     |                            |
| Inbred-Susceptible Edinburgh        | 1, 2                       | fwd<br>rev                           | TGGTCACCTTTCGTCATCGG<br>GAATTCCTCGCCGCTTCCAG            | 1077                 | 40                  | 69.3                       |
|                                     | 2, 3, 4                    | fwd<br>rev                           | AGTCAATAAAGTAGGTGGAGACGT<br>GCTTCGGTACCCCTGAAACC        | 694                  | 30                  | 63.0                       |
|                                     | 5, 6, 7                    | fwd<br>rev                           | CTCTTTAGATCCGCCCAACTGT<br>TTTAAATCAACCAAACCTCAGAGG      | 501                  | 30                  | 60.9                       |
|                                     | 8, 9                       | fwd<br>rev                           | CGTTCCTGCCGTTTCGATTGT<br>CGAGCTTGAACCGTTTCTCG           | 429                  | 30                  | 64.4                       |
|                                     | 10, 11, 12                 | fwd<br>rev                           | TGCTTCAGAAATGGCCATCA<br>GCACGATTCTACCTCAGCA             | 603                  | 40                  | 60.5                       |
|                                     | 13                         | fwd<br>rev                           | AGATGGACTGAGTTGACGGC<br>CACCTCGGTATCATTGTGTGCA          | 162                  | 15                  | 62.4                       |
|                                     | 14                         | fwd<br>rev                           | AGTCCTCGAAGTCTCGGTCA<br>CTCAGGAGGAACAACCACCA            | 122                  | 15                  | 61.9                       |
|                                     |                            |                                      |                                                         |                      |                     |                            |
| McMaster                            | 1                          | fwd<br>rev                           | CTCTAGCGATACGACGGTG<br>AGTTCAAGGTACCTTATGAAAGCT         | 115                  | 40                  | 61.0                       |
|                                     | 2, 3, 4                    | fwd<br>rev                           | GGTTTGAAAGACTTACTTACAGCT<br>ATT<br>TGTGAGTCAACGCACCTTCT | 611                  | 30                  | 63.1                       |
|                                     | 5, 6, 7                    | fwd<br>rev                           | CTCTTTAGATCCGCCCAACTGT<br>TTTAAATCAACCAAACCTCAGAGG      | 501                  | 30                  | 60.9                       |
|                                     | 8, 9                       | fwd<br>rev                           | CGTTCCTGCCGTTTCGATTGT<br>CGAGCTTGAACCGTTTCTCG           | 429                  | 30                  | 63.3                       |
|                                     | 10, 11, 12                 | fwd<br>rev                           | TGCTTCAGAAATGGCCATCA<br>GCACGATTCTACCTCAGCA             | 617                  | 40                  | 61.4                       |
|                                     | 13                         | fwd<br>rev                           | AGATGGACTGAGTTGACGGC<br>CACCTCGGTATCATTGTGTGCA          | 162                  | 15                  | 63.3                       |
|                                     | 14                         | fwd<br>rev                           | CCTCGAAGTCTCGGTACAA<br>TGCTGTCATAAGTGTCTCTTCG           | 122                  | 15                  | 63.4                       |
|                                     |                            |                                      |                                                         |                      |                     |                            |

Table S3: Template alignment and sequence analysis of Hco-Cyp-13A11 for the isolates Inbred-Susceptible Edinburgh (ISE), McMaster (McM), White River (WR), and Berlin-Selected Isolate (BSI) used for single alignment modeling.

| Protein | Organism            | PDB ID            | Resolution [Å] | Inhibitor <sup>c</sup>                                          | Sequence identity (%) |        |        |        | E-value |       |       |       | Chain length |
|---------|---------------------|-------------------|----------------|-----------------------------------------------------------------|-----------------------|--------|--------|--------|---------|-------|-------|-------|--------------|
|         |                     |                   |                |                                                                 | ISE                   | McM    | WR     | BSI    | ISE     | McM   | WR    | BSI   |              |
| Cyp-3A4 | <i>Homo sapiens</i> | 6MA7 <sup>a</sup> | 2.09           | Fluconazole                                                     | 28.71%                | 28.92% | 28.97% | 28.92% | 5e-58   | 5e-59 | 8e-60 | 1e-58 | 487          |
| Cyp-3A4 | <i>Homo sapiens</i> | 4D6Z <sup>a</sup> | 1.93           | Tert-butyl {6-oxo-6-[(pyridin-3-ylmethyl)amino]hexyl} carbamate | 29.32%                | 29.52% | 29.58% | 29.32% | 4e-57   | 4e-58 | 6e-59 | 8e-58 | 487          |
| Cyp-3A4 | <i>Homo sapiens</i> | 5A1R <sup>b</sup> | 2.45           | Progesterone                                                    | 28.39%                | 28.60% | 31.29% | 31.22% | -       | -     | -     | -     | 478          |

<sup>a</sup> The modeling templates were selected based on protein BLAST search (NCBI server).

<sup>b</sup> The modeling template was selected based on the SwissModel Template Search web tool (<https://swissmodel.expasy.org/interactive>). E-values are not given by the SwissModel Template Search web tool.

<sup>c</sup> Small molecule inhibitors bound the proteins when crystallized.



Table S4: Parameters for evaluating the best DOPE score model generated by Modeller (version 10.1) based on single alignment modeling and individual loop refinement.

|                                                | Inbred-susceptible Edinburgh <sup>e</sup> | McMaster              | White River           | Berlin-selected Isolate |
|------------------------------------------------|-------------------------------------------|-----------------------|-----------------------|-------------------------|
| <b>Modeller</b>                                |                                           |                       |                       |                         |
| Dope-Score                                     | -58285                                    | -59162                | -58290                | -57995                  |
| <b>Prosa-web<sup>a</sup></b>                   |                                           |                       |                       |                         |
| Z-score                                        | -7.66                                     | -8.06                 | -7.64                 | -7.57                   |
| <b>Errat<sup>b</sup></b>                       |                                           |                       |                       |                         |
| Overall quality factor                         | 61.46                                     | 61.78                 | 48.12                 | 53.84                   |
| <b>QMEAN3<sup>c</sup></b>                      |                                           |                       |                       |                         |
| QMEAN score                                    | 0.60 (Z-score: -5.24)                     | 0.62 (Z-score: -4.72) | 0.61 (Z-score: -4.79) | 0.62 (Z-score: -4.49)   |
| <b>ProCheck Ramachandran plot<sup>d</sup></b>  |                                           |                       |                       |                         |
| Residues in most favored regions               | 409 (87.0%)                               | 422 (89.4%)           | 415 (88.3%)           | 419 (88.8%)             |
| Residues in additional allowed regions         | 53 (11.3%)                                | 39 (8.3%)             | 44 (9.4%)             | 45 (9.5%)               |
| Residues in generously allowed regions         | 7 (1.5%)                                  | 10 (2.1%)             | 8 (1.7%)              | 5 (1.1% <sup>®</sup> )  |
| Residues in disallowed regions                 | 1 (0.2%)                                  | 1 (0.2%)              | 3 (0.6%)              | 3 (0.6%)                |
| Number of non-glycine and non-proline residues | 470 (100.0%)                              | 472 (100.0%)          | 470 (100.0%)          | 472 (100.0%)            |
| Number of end-residues                         | 2                                         | 2                     | 2                     | 2                       |
| Number of glycine residues                     | 28                                        | 26                    | 26                    | 26                      |
| Number of proline residues                     | 17                                        | 17                    | 17                    | 17                      |

<sup>a</sup> Predicted by <https://prosa.services.came.sbg.ac.at/prosa.php>.

<sup>b</sup> Predicted by <https://saves.mbi.ucla.edu/>.

<sup>c</sup> Predicted by <https://swissmodel.expasy.org/qmean/>.

<sup>d</sup> Predicted by <https://saves.mbi.ucla.edu/>.

<sup>e</sup> The inbred-susceptible Edinburgh sequence was obtained by exon sequencing.

Table S5: Predicted positions of human Cyp-3A4 involved in substrate and heme cofactor binding and corresponding amino acids for Cyp-13A11 in different *Haemonchus contortus* isolates from amino acid sequence alignment and molecular docking of the heme cofactor.

| Function                                                                                       | Cyp-3A4 <sup>a</sup> | Hco-Cyp-13A11    |                  |                  |                 |
|------------------------------------------------------------------------------------------------|----------------------|------------------|------------------|------------------|-----------------|
|                                                                                                |                      | ISE <sup>b</sup> | McM <sup>c</sup> | BSI <sup>d</sup> | WR <sup>e</sup> |
| Control of substrate specificity and regioselectivity (Sirim et al., 2010)                     | Ser119               | Phe117           | Phe117           | Phe117           | Phe117          |
| Roof of the active site (Yano et al., 2004a)                                                   | Leu210               | Ile206           | Ile206           | Ile206           | Ile206          |
|                                                                                                | Phe213               | Arg209           | Arg209           | Arg209           | Arg209          |
|                                                                                                | Phe215               | Leu211           | Leu211           | Leu211           | Leu211          |
| Allostery and stereoselectivity                                                                | Leu210               | Ile206           | Ile206           | Ile206           | Ile206          |
|                                                                                                | Leu211               | Phe207           | Phe207           | Phe207           | Phe207          |
|                                                                                                | Asp214               | Ser210           | Ser210           | Ser210           | Ser210          |
| Position a water molecule for proton transfer (Yano et al., 2004a)                             | Glu308               | Glu326           | Glu326           | Glu326           | Glu326          |
|                                                                                                | Thr309               | Asp327           | Asp327           | Asp327           | Asp327          |
| Active site residues (Yano et al., 2004a)                                                      | Ser119               | Phe117           | Phe117           | Phe117           | Phe117          |
|                                                                                                | Ile301               | Phe319           | Phe319           | Phe319           | Phe319          |
|                                                                                                | Phe304               | Phe322           | Phe322           | Phe322           | Phe322          |
|                                                                                                | Ala305               | Leu323           | Leu323           | Leu323           | Leu323          |
|                                                                                                | Ile369               | Leu388           | Leu388           | Leu388           | Leu386          |
|                                                                                                | Ala370               | Ala389           | Ala389           | Ala389           | Ala387          |
| Coordination of Heme propionates (Williams, 2004) and polar interaction sites <sup>f,g,h</sup> | Glu374               | Ser394           | Ser394           | Ser394           | Ser392          |
|                                                                                                | Arg105               | <i>Arg99</i>     | <i>Arg99</i>     | <i>Arg99</i>     | <i>Arg99</i>    |
|                                                                                                | Ile118               | <i>His115</i>    | <b>Val114</b>    | <b>Val114</b>    | <i>His115</i>   |
|                                                                                                | Trp126               | <u>Trp124</u>    | <u>Trp124</u>    | <u>Trp124</u>    | <u>Trp124</u>   |
|                                                                                                | Arg130               | <b>Arg128</b>    | <u>Arg128</u>    | <u>Arg128</u>    | <u>Arg128</u>   |
|                                                                                                | Arg375               | <i>Asn393</i>    | <i>Asn393</i>    | <i>Asn393</i>    | <b>Arg391</b>   |
|                                                                                                | Ser437               | <u>Arg395</u>    | <u>Arg395</u>    | <u>Arg395</u>    | <u>Arg393</u>   |
|                                                                                                | Arg440               | <b>Phe454</b>    | <b>Phe454</b>    | <b>Phe454</b>    |                 |
|                                                                                                |                      | <b>Arg459</b>    | <u>Arg459</u>    | <u>Arg459</u>    | <u>Arg457</u>   |
| Heme-binding (Yano et al., 2004a)                                                              | Cys442               | Cys461           | Cys461           | Cys461           | Cys459          |

<sup>a</sup> Predicted position in 1TQN crystal structure (Yano et al., 2004b).

<sup>b</sup> Own Inbred-susceptible Edinburgh *H. contortus* sequence.

<sup>c</sup> McMaster isolate.

<sup>d</sup> Berlin-selected isolate.

<sup>e</sup> White River Isolate.

<sup>f</sup> Non-covalent polar interaction sites predicted by PyMOL in bold.

<sup>g</sup> Hydrogen Bonds computed by PLIP (Adasme et al., 2021) are underlined.

<sup>h</sup> Polar interaction sites predicted by PyMOL and PLIP in cursive.

Table S6: Residues and their corresponding regions within the protein forming hydrogen bonds with the substrates. Only interacting residues for ligand conformations with the lowest docking energy are listed for the human Cyp-3A4 and homology models of Hco-Cyp-13A11. The prediction was performed with the PLIP web tool (Adasme et al., 2021).

| Drug                   | Region      | Cyp-3A4<br>(PDB:<br>6MA7)  | Hco-Cyp-13A11                  |                                     |                  |                |                                |
|------------------------|-------------|----------------------------|--------------------------------|-------------------------------------|------------------|----------------|--------------------------------|
|                        |             |                            | Region                         | Inbred-<br>susceptible<br>Edinburgh | McMaster         | White River    | Berlin-<br>selected<br>isolate |
| Ivermectin             |             | Asp76<br>Arg106<br>Thr224  |                                |                                     |                  | Tyr43<br>Thr76 |                                |
|                        |             |                            |                                |                                     |                  |                | Lys100                         |
|                        |             |                            | BC-loop                        | Ile103                              | Gly102           |                |                                |
|                        |             |                            |                                |                                     |                  | Arg113         | Arg113                         |
|                        |             |                            | FG-loop                        |                                     |                  | Arg209         |                                |
|                        |             |                            | $\alpha$ K- $\beta$ 1-4-linker |                                     | Leu388           | Ser392         |                                |
| Ivermectin<br>aglycone |             | Arg105                     |                                | Ser394                              | Ser394           |                |                                |
|                        |             |                            |                                | Phe500                              |                  |                |                                |
|                        |             |                            | BC-loop                        | Lys100                              |                  |                | Lys100                         |
|                        |             |                            |                                |                                     | His115           |                |                                |
|                        |             |                            | $\alpha$ K- $\beta$ 1-4-linker | Ser394                              |                  | Ala390         |                                |
|                        |             |                            |                                |                                     | Ser394           |                | Ser394                         |
| Selamectin             | BC-loop     | Ser119                     |                                |                                     |                  | Tyr43<br>Glu44 |                                |
|                        |             |                            |                                |                                     |                  |                | Lys100                         |
|                        |             |                            | BC-loop                        | Gly102                              |                  |                | Gly102                         |
|                        |             |                            |                                |                                     | His115           | His115         |                                |
|                        |             |                            | FG-loop                        |                                     |                  | Arg209         |                                |
|                        |             |                            | $\alpha$ K- $\beta$ 1-4-linker |                                     |                  | Ser392         |                                |
| Doramectin             | BC-loop     | Ser119<br>Phe220<br>Thr224 |                                |                                     | Ser394           |                |                                |
|                        |             |                            |                                |                                     | Lys100           |                |                                |
|                        |             |                            | BC-loop                        |                                     | Ile103           |                |                                |
|                        |             |                            |                                | Arg113                              |                  |                |                                |
|                        |             |                            | FG-loop                        | Arg209                              |                  | Arg209         | Arg209<br>Gln213               |
|                        |             |                            | $\alpha$ K- $\beta$ 1-4-linker | Ser394                              | Ser394           |                |                                |
| Eprinomectin           | $\beta$ 2-2 | Gln79<br>Glu122<br>Gly391  | $\beta$ 4-1                    |                                     |                  | Arg495         | Arg497                         |
|                        |             |                            |                                | Thr46                               |                  |                |                                |
|                        |             |                            | BC-loop                        |                                     | Gly102           |                |                                |
|                        |             |                            | $\beta$ 3-1                    |                                     |                  | Phe170         |                                |
|                        |             |                            |                                |                                     | Arg208           |                | Arg208                         |
|                        |             |                            | FG-loop                        |                                     | Arg209           |                |                                |
|                        |             |                            |                                |                                     |                  |                | Ala235                         |
|                        |             |                            | $\alpha$ I                     |                                     |                  | Thr330         |                                |
|                        |             |                            | $\alpha$ K- $\beta$ 1-4-linker | Ala389<br>Ser394                    | Ser394           |                |                                |
|                        |             |                            | $\beta$ 4-1                    |                                     |                  |                | Arg497                         |
| Moxidectin             |             | Arg105<br>Arg106<br>Thr224 |                                |                                     |                  |                |                                |
|                        |             |                            |                                |                                     |                  |                | Asp47<br>Lys100                |
|                        |             |                            | BC-loop                        |                                     |                  | Ser101         |                                |
|                        |             |                            |                                |                                     | Gly102<br>Arg113 | Arg113         |                                |
|                        |             |                            | FG-loop                        |                                     |                  | Arg226         | Arg209                         |
|                        |             |                            | $\alpha$ K- $\beta$ 1-4-linker | Ser394                              |                  |                |                                |
